# Supplementary material for: Early Celastrol Administration Prevents Ketamine-Induced Psychotic-Like Behavioral Dysfunctions, Oxidative Stress and IL-10 Reduction in The Cerebellum of Adult Mice
Source: PubMed Central journal article supplement (PMC6864687; doi:10.3390/molecules24213993), 2019-11-05
Supplement: molecules-24-03993-s001.pdf [file molecules-24-03993-s001.pdf]

**A) Body weight gain (g)**

Saline (n=7):  $21.97 \pm 0.3264$

Ketamine (n=13):  $21.95 \pm 0.3267$

DMSO (n=7):  $22.67 \pm 0.4052$

Celastrol (n=8):  $22.18 \pm 0.4495$

Ketamine+Celastrol (n=14):  $22.69 \pm 0.3525$

One Way ANOVA, followed by Tukey's post hoc test  $F= 0.9866$ ,  $p>0.05$  for all comparisons

**B) Body weight (g) at the time of behavioral tests (10 weeks of age)**

Saline (n=7):  $26.83 \pm 0.3092$

Ketamine (n=13):  $26.65 \pm 0.2480$

DMSO (n=7):  $27.17 \pm 0.3914$

Celastrol (n=8):  $26.95 \pm 0.4840$

Ketamine+Celastrol (n=14):  $27.34 \pm 0.2401$

One Way ANOVA, followed by Tukey's post hoc test  $F= 0.8986$ ,  $p>0.05$  for all comparisons
